# Supplementary material for: Purification of Messenger Ribonucleoprotein Particles via a Tagged Nascent Polypeptide
Source: PubMed Central journal article supplement (PMC4726818; doi:10.1371/journal.pone.0148131), 2016-01-25
Supplement: pone.0148131.s001.pdf [file pone.0148131.s001.pdf]

**Day1**

Induction of reporters

Cell collection

UV cross-linking

Cycloheximide treatment (CHX)

**Day2**

Cell lysis

Polyribosomal fractionation

Affinity Purification

**Day3**

Preparation of samples for MS  
Northern blot and  
Western blot

**Day4**

Samples for MS  
Detection by  
Northern blot  
Western blot
