# Supplementary material for: Purification of Messenger Ribonucleoprotein Particles via a Tagged Nascent Polypeptide
Source: PubMed Central journal article supplement (PMC4726818; doi:10.1371/journal.pone.0148131), 2016-01-25
Supplement: pone.0148131.s004.pdf [file pone.0148131.s004.pdf]

## Tested and possible adjustments in the protocol

Most tests were done at least twice.

| Procedure                                                                                                                         | Pros / discussion                                                                                                                                                                                                                              | Cons                                                                                                                                                                                                                                                                                                                                                                                                                                                                                   |
|-----------------------------------------------------------------------------------------------------------------------------------|------------------------------------------------------------------------------------------------------------------------------------------------------------------------------------------------------------------------------------------------|----------------------------------------------------------------------------------------------------------------------------------------------------------------------------------------------------------------------------------------------------------------------------------------------------------------------------------------------------------------------------------------------------------------------------------------------------------------------------------------|
| <b>Pre-lysis treatment</b>                                                                                                        |                                                                                                                                                                                                                                                |                                                                                                                                                                                                                                                                                                                                                                                                                                                                                        |
| Cycloheximide                                                                                                                     | Stabilises the polysomes throughout the procedure                                                                                                                                                                                              | Build-up of ribosomes near start codon (not really a disadvantage)                                                                                                                                                                                                                                                                                                                                                                                                                     |
| UV cross-linking to achieve covalent binding of proteins to RNA                                                                   | Bound proteins will wash off less easily. Complex stays stable after denaturation, so the eluate could be used for a second purification step that does not require intact protein-protein interactions.                                       | Fewer high molecular-weight polysomes obtained. If cross-linking were very efficient, RNase treatment would be necessary to elute the proteins (not really a disadvantage).                                                                                                                                                                                                                                                                                                            |
| Formaldehyde cross-linking to achieve covalent binding of proteins to RNA                                                         | More efficient cross-linking than UV; also will include important proteins that are not directly bound to RNA, part of mRNA-bound complexes.                                                                                                   | If intact cells are fixed, they can be broken only by physical procedures (e.g. sonication) that break the mRNA. Treatment of lysates eliminated polysome profiles. Formaldehyde could cross-link too many molecules, reducing specificity.                                                                                                                                                                                                                                            |
| <b>Cell lysis</b>                                                                                                                 |                                                                                                                                                                                                                                                |                                                                                                                                                                                                                                                                                                                                                                                                                                                                                        |
| Cytosolic extract, prepared by grinding with silicon carbide in isotonic (10% sucrose) buffer, centrifugation at 17,000 g for 1h. | None                                                                                                                                                                                                                                           | Centrifugation at 17,000 g did not remove the 3SBP-CAT-SKL.                                                                                                                                                                                                                                                                                                                                                                                                                            |
| Cytosolic extract, prepared by grinding with silicon carbide in isotonic (10% sucrose) buffer, centrifugation at 33,000 g for 1h. | Mature 3SBP-CAT-SKL, glycosomal enzymes and cytoskeletal proteins are removed from the lysate. (80% of the CAT activity was in the pellet.) This not only removes contaminants but should also reduce the amount of streptavidin beads needed. | About 2/3 of the <i>CAT</i> RNA was lost in the centrifugation step. After loading on the polysome gradient, cytosolic lysate from at least $6 \times 10^8$ cells was needed in order to detect the <i>CAT</i> mRNA.<br>Lysis with silicon carbide takes longer than NP40 (5-10 min to achieve 95% lysis, monitored microscopically). The extra centrifugation provides more possibility for RNA degradation. Overall too much polysomal RNA and protein is lost using this procedure. |
| Total (cleared) cell lysate made using NP40                                                                                       | More efficient polysome and RNA recovery. Purified <i>CAT</i> RNA readily detected from polysomes originating from $3 \times 10^8$ trypanosomes                                                                                                | Organellar and cytoskeletal proteins heavily contaminate the lysate that is loaded on the polysome gradient.                                                                                                                                                                                                                                                                                                                                                                           |

| <b>Polysome gradient</b>                                                       |                                                                                                                                                                                                                                                                                                   |                                                                                                                                                                                                                                                                             |
|--------------------------------------------------------------------------------|---------------------------------------------------------------------------------------------------------------------------------------------------------------------------------------------------------------------------------------------------------------------------------------------------|-----------------------------------------------------------------------------------------------------------------------------------------------------------------------------------------------------------------------------------------------------------------------------|
| Standard protocol according to ref 18; buffer with 120 mM KCl                  | Using cytosolic (glycosome-free) input lysates, the polysome purification removes 2/3 of the residual CAT activity.<br>Using NP40 lysates, the gradient gives 10-fold purification at the protein level.<br>A different buffer with 280 mM NaCl gave slightly poorer resolution of the polysomes. | This step is time-consuming (2h centrifugation plus half-hour to collect 6 gradients). The maximum capacity of a 12-14 ml gradient would be about $1.2 \times 10^9$ cells, so no more than $8 \times 10^9$ cells could be used per centrifuge load. We used 4 ml gradients. |
| <b>Affinity purification</b>                                                   |                                                                                                                                                                                                                                                                                                   |                                                                                                                                                                                                                                                                             |
| 1 SBP tag (tested using cytosolic extracts)                                    | None                                                                                                                                                                                                                                                                                              | The polysomes did not bind to streptavidin magnetic beads.                                                                                                                                                                                                                  |
| 3 SBP tags (tested using cytosolic and total lysates)                          | Reporter polysomes bind to both magnetic and sepharose streptavidin beads                                                                                                                                                                                                                         | Much better binding than 1 SBP, as shown in ref 15. The polysomes cannot be eluted using biotin.                                                                                                                                                                            |
| 2 SBP tags                                                                     | Not tested; might give sufficient binding but preserve elutability with biotin.                                                                                                                                                                                                                   |                                                                                                                                                                                                                                                                             |
| Streptavidin-magnetic beads                                                    | We thought that these would give less trapped material.                                                                                                                                                                                                                                           | More expensive than streptavidin-sepharose. In several experiments, the eluted <i>CAT:TUB</i> RNA ratio was not as high as for the sepharose beads. It might be possible to improve this by trying alternative binding and wash conditions.                                 |
| Streptavidin-Sepharose beads                                                   | Usually gave about 2-fold higher <i>CAT:TUB</i> ratios than magnetic beads. Also cheaper.                                                                                                                                                                                                         | Possible trapping of contaminants within the bead matrix.                                                                                                                                                                                                                   |
| Volume of sepharose beads: 25 $\mu$ l for polysomes from $7 \times 10^8$ cells | 25 $\mu$ l gave less contamination with <i>TUB</i> mRNA than 50 $\mu$ l or 75 $\mu$ l.                                                                                                                                                                                                            | 50 $\mu$ l and 75 $\mu$ l pulled down rather more <i>CAT</i> mRNA (about 50%) but with twice as much <i>TUB</i> contamination.                                                                                                                                              |
| 3-6 washes                                                                     | 3 washes were used in initial trial, but we increased it to 6 for mass spectrometry,                                                                                                                                                                                                              | Additional washes are unlikely to reduce contamination much further.                                                                                                                                                                                                        |
| Elution with 10 mM biotin                                                      | Should be specific, leaving trapped contaminants - including other polysomes - on the beads.                                                                                                                                                                                                      | Nothing was eluted.                                                                                                                                                                                                                                                         |
| Elution with RNase                                                             | Should result in selective release of proteins that are bound to the beads via the RNA.<br>Contamination non-polysomal components should be reduced.                                                                                                                                              | In a trial using the <i>HSP70</i> 3'-UTR, no ZC3H11 was eluted. Further testing of this might be worthwhile.                                                                                                                                                                |
| Elution with SDS at 95°C                                                       | RNA and proteins released                                                                                                                                                                                                                                                                         | Indiscriminate: all contaminants are obtained. The eluate is unsuitable for any further purification steps that require intact protein structure. Purification methods that require intact                                                                                  |

|                                                        |                                                                                                                                                                                                                                                                                                                                                                                |                                                                                                                                                                                                                                                                                                                                                                                                                                                                                                             |
|--------------------------------------------------------|--------------------------------------------------------------------------------------------------------------------------------------------------------------------------------------------------------------------------------------------------------------------------------------------------------------------------------------------------------------------------------|-------------------------------------------------------------------------------------------------------------------------------------------------------------------------------------------------------------------------------------------------------------------------------------------------------------------------------------------------------------------------------------------------------------------------------------------------------------------------------------------------------------|
|                                                        |                                                                                                                                                                                                                                                                                                                                                                                | RNA secondary structure might also be affected.                                                                                                                                                                                                                                                                                                                                                                                                                                                             |
| Elution with alternative (partially) denaturing agents | Not tested, but could be useful if a second purification step is to be applied.                                                                                                                                                                                                                                                                                                |                                                                                                                                                                                                                                                                                                                                                                                                                                                                                                             |
| Add a second affinity purification step                | <p>This should give sufficiently pure mRNPs to find specific bound proteins.</p> <p>If used after our method, the additional method would have to be able to cope with mRNPs that are at least partially denatured. UV cross-linking prior to cell lysis would be essential.</p> <p>If used before our method, the additional method would have to leave polysomes intact.</p> | <p>Starting with <math>4 \times 10^9</math> cells, our method did not allow detection of a specific mRNP protein by mass spectrometry. This suggests that a minimum of <math>10^{10}</math> cells should be used (12x 12-14 ml sucrose gradients). Assuming 5% yield from the second step, at least <math>10^{11}</math> cells would be needed as starting material - nearly 100 sucrose gradients.</p> <p>Adding a second method without intermediate storage would require working through the night.</p> |
